# Supplementary material
Source: PubMed Central journal article supplement (PMC6759811)
Supplement: NIHMS1049932-supplement-Supplementary_file_1.pdf [file NIHMS1049932-supplement-Supplementary_file_1.pdf]

## SUPPLEMENTARY FIGURE LEGENDS

**Supplementary Figures S1–S6: (n = 4/genotype for Serpinb3a<sup>-/-</sup> and Serpinb3a<sup>+/+</sup>Balb/c background strain)**

**Fig. S1.** Percentage confluence of Serpinb3a<sup>-/-</sup> and Serpinb3a<sup>+/+</sup> Balb/c background bone marrow cells.

**Fig. S2.** Numbers of cobblestone islands for Serpinb3a<sup>-/-</sup> and Serpinb3a<sup>+/+</sup> Balb/c background bone marrow cells.

**Fig. S3.** Day 7 cell colony counts for Serpinb3a<sup>-/-</sup> and Serpinb3a<sup>+/+</sup> Balb/c background bone marrow cells.

**Fig. S4.** Day 14 cell colony counts for Serpinb3a<sup>-/-</sup> and Serpinb3a<sup>+/+</sup> Balb/c background bone marrow cells.

**Fig. S5.** Increased 10 Gy radiation-induced mRNA for transcription factors in Serpinb3a<sup>-/-</sup> mouse cells.

**Fig. S6.** Panel A: Serpinb3a<sup>-/-</sup> mouse plasma proteins over 5 days after 8 Gy TBI. Panel B: Marrow stromal cell line proteins over 24 h after 10 Gy irradiation.

## SUPPLEMENTARY TABLES

**Table S1.** Weekly measurement of percentage confluence of adherent layer of Serpinb3a<sup>-/-</sup> mouse LTBMCS.

**Table S2.** Weekly cobblestone islands in adherent layer of Serpinb3a<sup>-/-</sup> LTBMCS.

**Table S3.** Weekly production of nonadherent cells per flask of Serpinb3a<sup>-/-</sup> mouse LTBMCS.

**Table S4.** Weekly production of nonadherent cells per flask that contain day 7 colony-forming hematopoietic progenitor cells.

**Table S5.** Weekly production of nonadherent cells per flask that contain day 14 colony-forming hematopoietic progenitor cells.

Supplementary Figure S1:

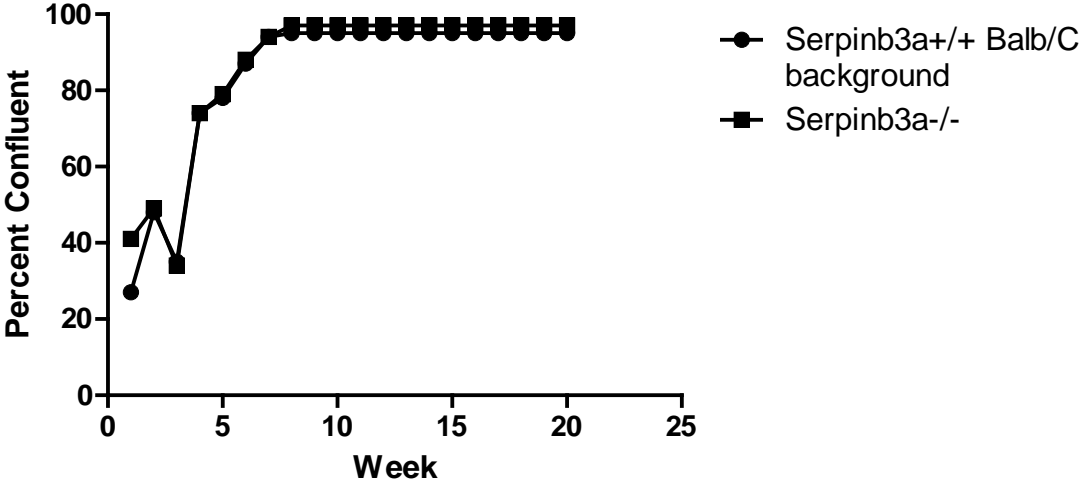

Supplementary Figure S2:

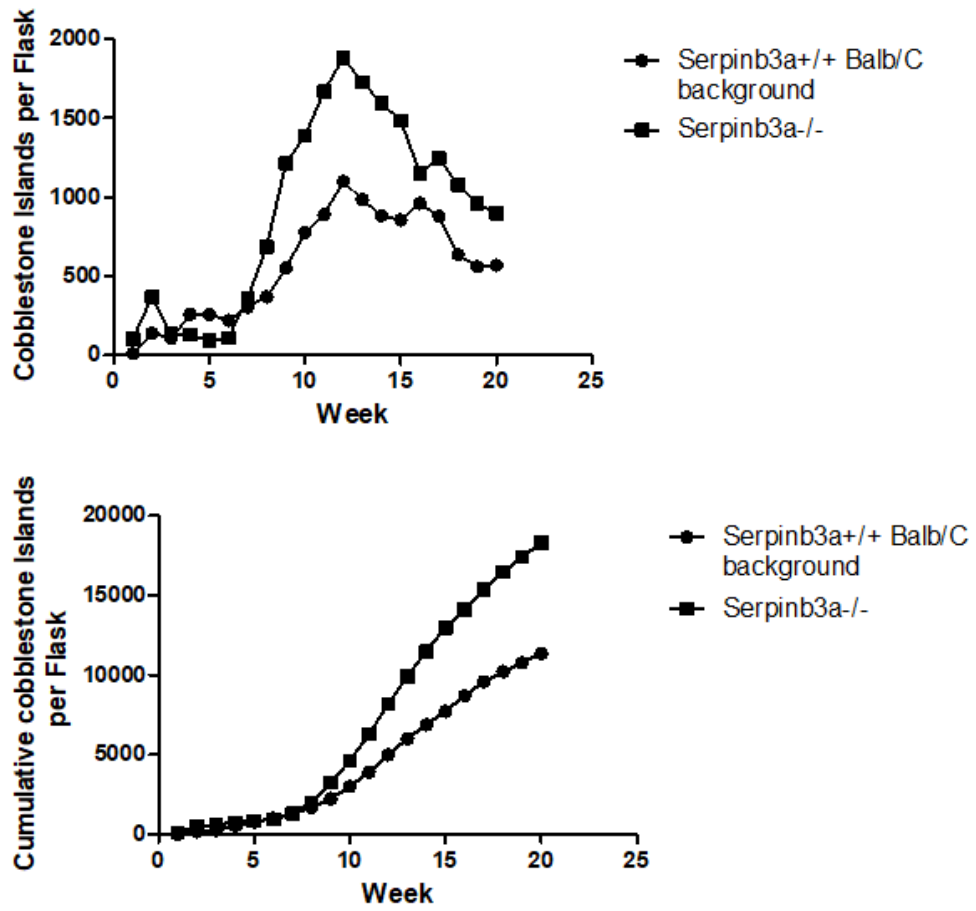

Supplementary Figure S3:

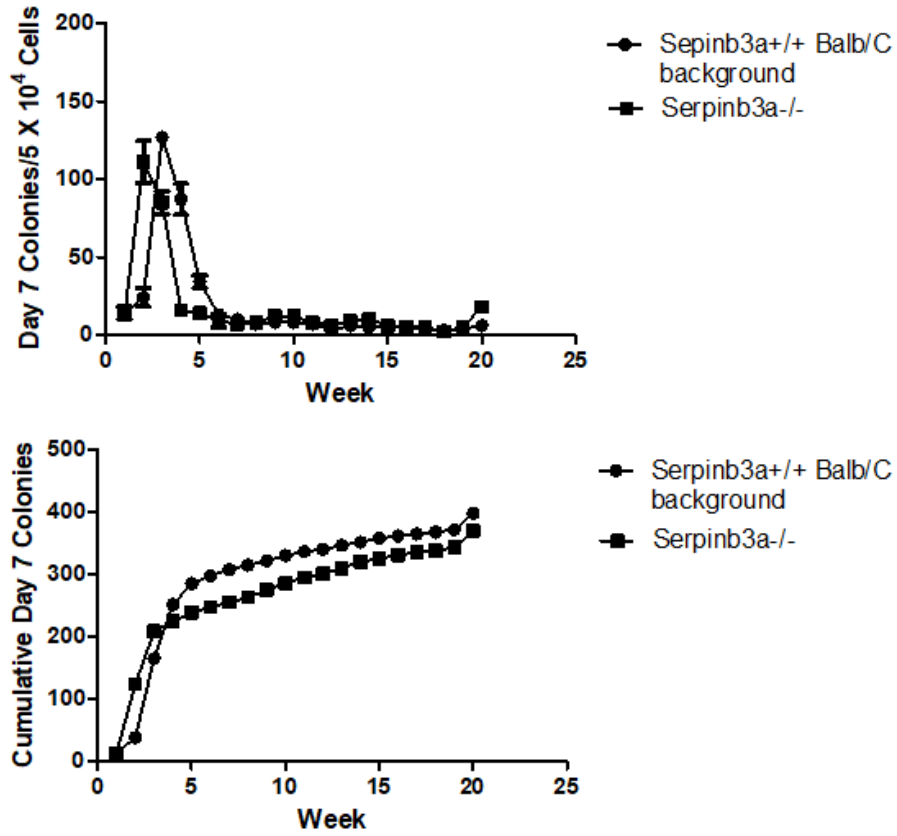

Supplementary Figure S4:

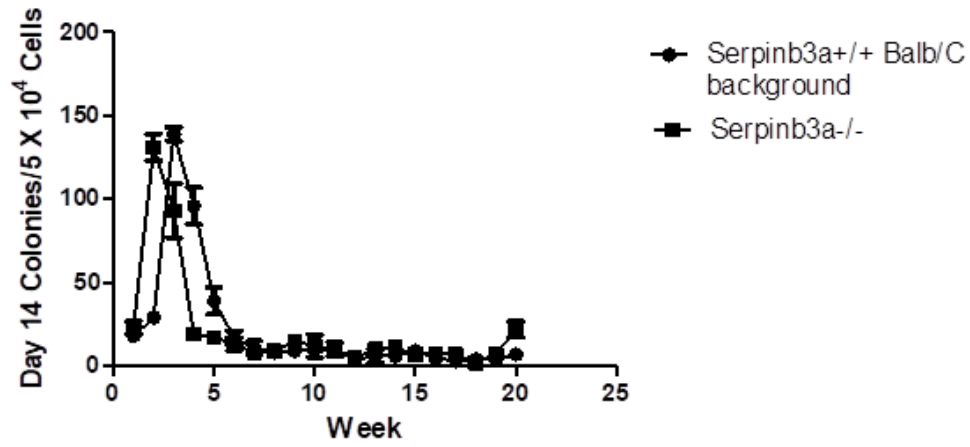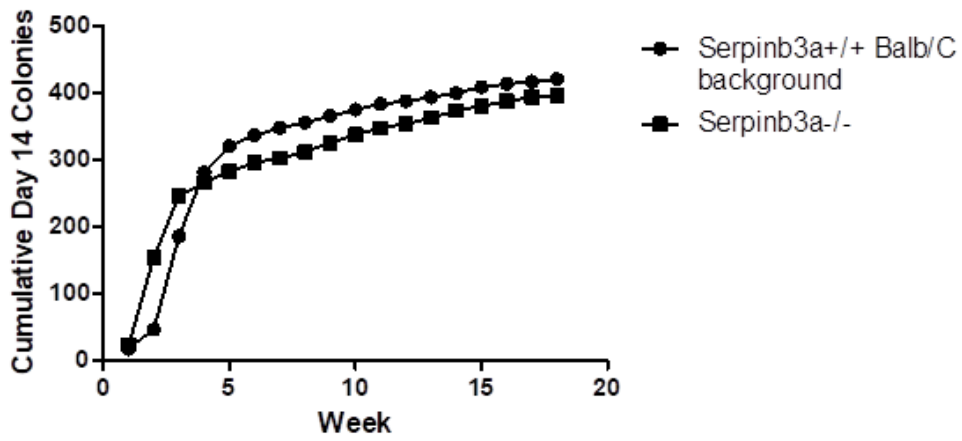

**Supplementary Figure S5: Increased 10 Gy Irradiation-Induced mRNA for Transcription Factors in Serpinb3a<sup>-/-</sup> Mouse Cells.**

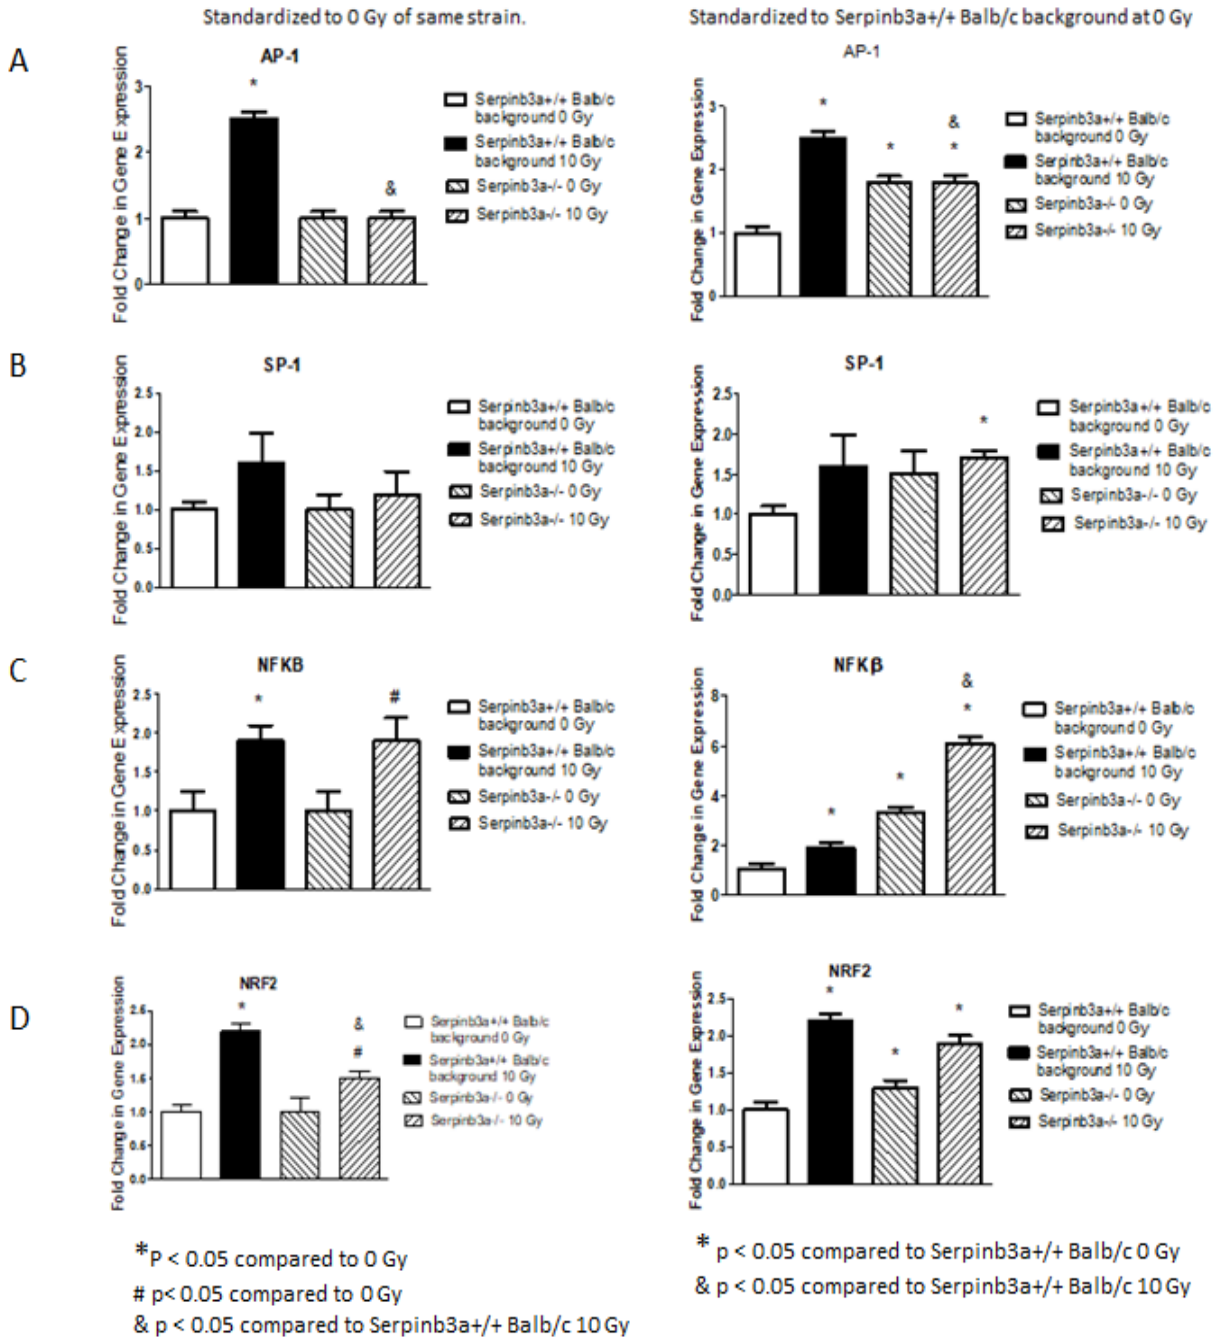

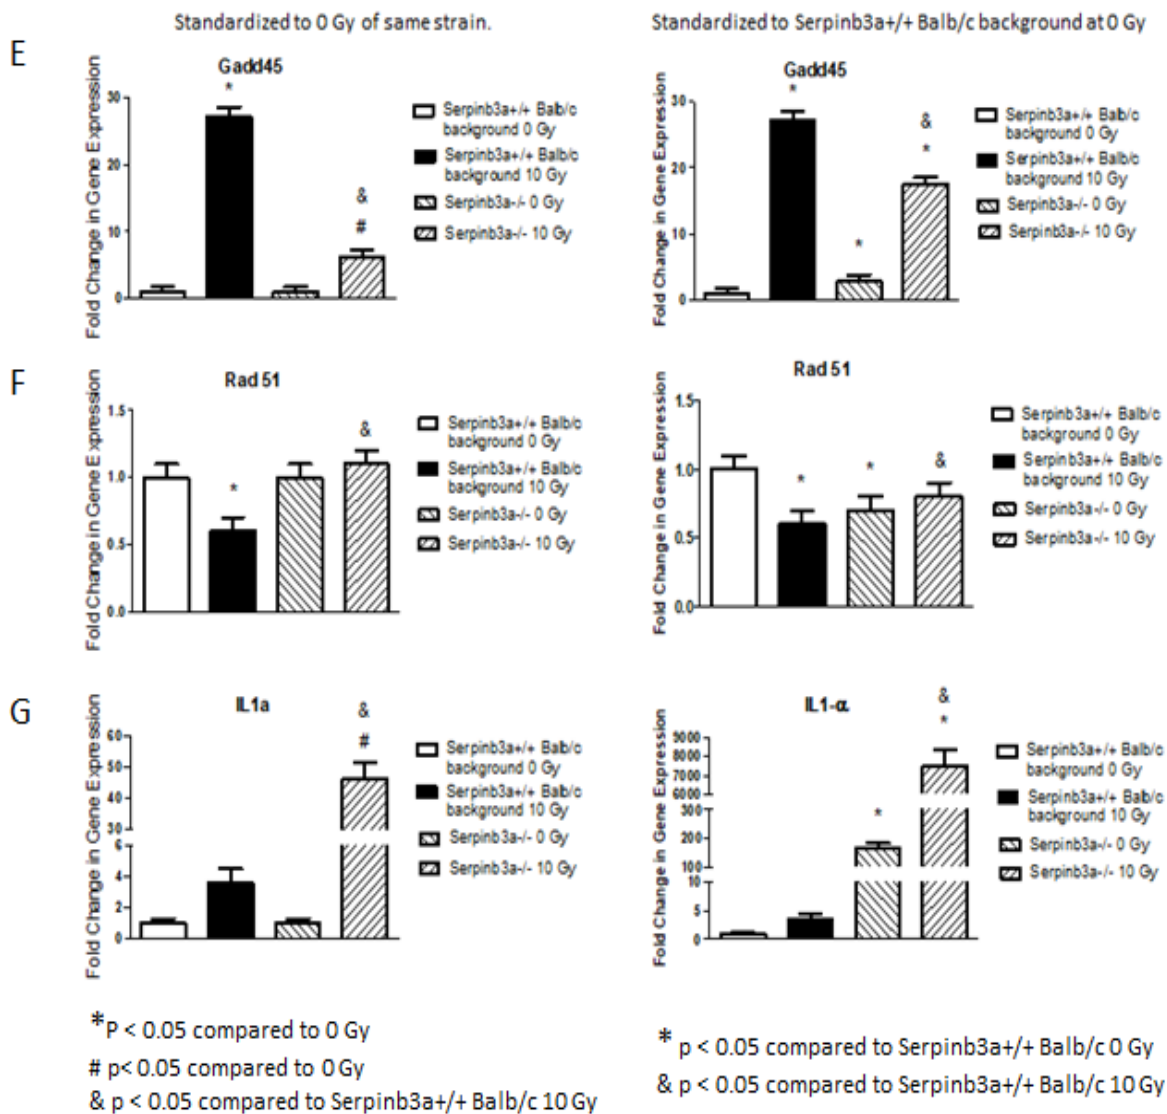

**Supplementary Figure S6: A) Serpinb3a<sup>-/-</sup> Mouse Plasma Proteins Over 5 Days Post-8 Gy TBI; and B) Marrow Stromal Cell Line Proteins Over 24 Hours After 10 Gy Irradiation.**

**A.**

| Mouse Plasma Protein Levels |                                               |         |         |         |           |                          |        |         |         |
|-----------------------------|-----------------------------------------------|---------|---------|---------|-----------|--------------------------|--------|---------|---------|
|                             | Serpinb3a <sup>+/+</sup><br>Balb/C Background |         |         |         |           | Serpinb3a <sup>-/-</sup> |        |         |         |
|                             | Day 1                                         | Day 2   | Day 3   | Day 5   |           | Day 1                    | Day 2  | Day 3   | Day 5   |
| G-CSF                       | 0.0100                                        | <0.0001 | <0.0001 | <0.0001 | G-CSF     | 0.0272                   | 0.302  | <0.0001 | <0.0001 |
| MCP-1                       | 0.3993                                        | <0.0001 | 0.0179  | 0.8605  | MCP-1     | 0.7993                   | 0.0888 | 0.3979  | 0.0661  |
| IL-6                        | 0.0567                                        | <0.0001 | 0.1051  | 0.0242  | IL-6      | 1.000                    | 1.060  | 1.006   | 0.0001  |
| KC                          | 0.0811                                        | <0.0001 | 0.0153  | 0.0002  | KC        | 0.3109                   | 0.5658 | 0.5030  | <0.0001 |
| Exotaxin                    | 0.6202                                        | 0.0256  | <0.0001 | 0.0002  | Exotaxin  | 0.5822                   | 0.2113 | 0.5758  | 0.8511  |
| RANTES                      | 0.0641                                        | 0.7574  | 0.3134  | 0.1007  | RANTES    | 0.9326                   | 0.1297 | 0.1664  | 0.3746  |
| MIC                         | 0.0889                                        | 0.1717  | 0.0019  | 0.00925 | MIC       | 0.0786                   | 0.7098 | 0.0008  | 0.1482  |
| IP-10                       | 0.2975                                        | 0.7964  | 0.41895 | 0.4762  | IP-10     | 0.0859                   | 0.3746 | 0.0016  | 0.1254  |
| LIF                         | 1.000                                         | 1.000   | 1.000   | 1.000   | LIF       | 0.5853                   | 0.5083 | 0.5083  | 0.5183  |
| GM-CSF                      | 0.4922                                        | 0.3005  | 0.6771  | 0.7728  | GM-CSF    | 1.000                    | 0.3677 | 0.9251  | 0.5324  |
| IFN Beta                    | 0.8949                                        | 0.0628  | 0.7644  | 0.7326  | IFN-Beta  | 0.2431                   | 0.1446 | 0.1405  | 0.0004  |
| IL-1a                       | 0.4002                                        | 0.5306  | 0.4583  | 0.9463  | IL-1a     | 0.2153                   | 0.3616 | 0.2915  | 0.2414  |
| IL-1b                       | 0.9953                                        | 0.1353  | 0.8548  | 0.4805  | IL-1b     | 0.04678                  | 0.7103 | 0.2810  | 0.4568  |
| IL-2                        | 0.9173                                        | 0.2170  | 0.5937  | 0.2621  | IL-2      | 0.1892                   | 0.0898 | 0.0004  | 0.5247  |
| IL-5                        | 0.4572                                        | 0.0022  | <0.0001 | <0.0001 | IL-5      | 0.4535                   | 0.0244 | 0.0006  | 0.0002  |
| IL-7                        | 0.6024                                        | 0.0545  | 0.5262  | 0.4506  | IL-7      | 0.4616                   | 0.5118 | 0.3041  | 0.3843  |
| IL-9                        | 0.0168                                        | 0.0748  | 0.0817  | 0.0384  | IL-9      | 0.0793                   | 0.9759 | 0.4574  | 0.8654  |
| IL-10                       | 0.2929                                        | 0.1092  | 0.4427  | 0.4027  | IL-16     | 0.4595                   | 0.2571 | 0.3493  | 1.000   |
| IL-12 p40                   | 0.7787                                        | 0.4223  | 0.6270  | 0.1580  | IL-12 p40 | 0.9609                   | 0.1853 | 0.4489  | 0.2689  |
| IL-12-p70                   | 0.7394                                        | 0.3529  | 0.9115  | 0.4860  | IL-12-p70 | 0.1940                   | 0.3776 | 0.3407  | 0.4509  |
| IL-13                       | 0.2544                                        | 0.5864  | 0.6963  | 0.4718  | IL-13     | 0.0200                   | 0.0048 | 0.0533  | 0.8553  |
| LIX                         | 0.0928                                        | 0.5083  | 0.2623  | 0.3087  | LIX       | 0.0109                   | 0.6015 | 0.8944  | 0.0262  |
| IL-15                       | 0.6973                                        | 0.0357  | 0.7647  | 0.7152  | IL-15     | 0.3922                   | 0.5310 | 0.2604  | 0.1954  |
| MIP1a                       | 0.3014                                        | 0.0168  | 0.1224  | 0.7591  | MIP1a     | 0.9697                   | 0.3155 | 0.8960  | 0.8430  |
| MIP1b                       | 0.1546                                        | 0.0024  | 0.5900  | 0.9638  | MIP1b     | 0.0482                   | 0.0402 | 0.1172  | 0.0624  |
| MIP 2                       | 0.7374                                        | 0.0963  | 0.5300  | 0.7167  | MIP 2     | 0.5159                   | 0.9057 | 0.6204  | 0.7920  |
| MCSF                        | 0.6842                                        | 0.0310  | 0.5647  | 0.7047  | MCSF      | 0.7442                   | 0.4323 | 0.3415  | 0.1560  |
| TNF                         | 0.9390                                        | 0.1912  | 0.1326  | 0.4226  | TNF       | 0.5090                   | 0.5911 | 0.7438  | 0.0641  |
| IL-3                        | 1.000                                         | 0.8458  | 0.8458  | 1.000   | IL-3      | 0.1455                   | 0.0863 | 0.1704  | 0.1975  |
| IL-4                        | 1.000                                         | 1.000   | 1.000   | 1.000   | IL-4      | 1.000                    | 1.000  | 1.000   | 1.000   |
| IL-17                       | 0.3250                                        | 0.0027  | 0.0449  | 0.1723  | IL-17     | 0.5041                   | 0.5801 | 0.7132  | 0.0152  |
| VEGF                        | 0.3346                                        | 0.7096  | 0.2572  | 0.1351  | VEGF      | 0.5222                   | 0.6871 | 0.8042  | 0.2215  |



## Supplementary Figure S6B:

### Stromal Cell Protein Levels

| Cytokine  | Serpib3a <sup>+/+</sup><br>Balb/c Background |         |         | Cytokine  | Serpib3a <sup>-/-</sup> |         |         |
|-----------|----------------------------------------------|---------|---------|-----------|-------------------------|---------|---------|
|           | Hour 1                                       | Hour 3  | Hour 24 |           | Hour 1                  | Hour 3  | Hour 24 |
| G-CSF     | <0.0001                                      | 0.0009  | 0.0919  | G-CSF     | 0.0006                  | 0.2780  | 0.2282  |
| GM-CSF    | 0.0024                                       | 0.0216  | 0.0469  | GM-CSF    | 0.2922                  | 0.0076  | 0.1198  |
| Exotaxin  | 0.0004                                       | 0.0082  | 0.0205  | Exotaxin  | 0.0124                  | 0.0022  | 0.0903  |
| IL-6      | <0.0001                                      | 0.0002  | 0.6871  | IL-6      | <0.0001                 | <0.0001 | 0.1989  |
| LIF       | 0.0007                                       | 0.0019  | 0.6539  | LIF       | <0.0001                 | <0.0001 | 0.0016  |
| KC        | 0.0009                                       | 0.0032  | 0.4456  | KC        | <0.0001                 | <0.0001 | 0.6011  |
| INF-Beta  | 0.6368                                       | 0.3269  | 0.3375  | INF-Beta  | 0.64086                 | 0.7733  | 0.2696  |
| IL-1a     | 0.1120                                       | 0.9571  | 0.8143  | IL-1a     | 0.2038                  | 0.1609  | 0.8231  |
| IL-1b     | <0.0001                                      | <0.0001 | 0.1135  | IL-1b     | 0.0545                  | 0.0093  | 0.02629 |
| IL-2      | 0.0476                                       | 0.0751  | 0.8407  | IL-2      | 0.5393                  | 0.2590  | 0.4651  |
| IL-4      | 0.6131                                       | 0.4393  | 0.0881  | IL-4      | 0.8055                  | 0.6542  | 0.7595  |
| IL-3      | 0.0128                                       | 0.0139  | 0.5831  | IL-3      | 0.0817                  | 0.1300  | 0.4686  |
| IL-5      | 0.0144                                       | 0.0026  | 0.5370  | IL-5      | 0.0194                  | 0.0519  | 0.1427  |
| IL-7      | 0.1227                                       | 0.0943  | 0.4867  | IL-7      | 0.4407                  | 0.9554  | 0.9683  |
| IL-9      | 0.0155                                       | 0.0194  | 0.2773  | IL-9      | 0.5734                  | 0.7591  | 0.2130  |
| IL-10     | 0.0590                                       | 0.0047  | 0.2943  | IL-10     | 0.1201                  | 0.5939  | 0.9160  |
| IL-12 p40 | 0.0584                                       | 0.0812  | 0.4105  | IL-12 p40 | 0.5953                  | 0.7848  | 0.8002  |
| IL-12-p70 | 0.0517                                       | 0.0134  | 0.0656  | IL-12-p70 | 0.8248                  | 0.8053  | 0.6428  |
| IL-13     | 0.4669                                       | 0.4336  | 0.349   | IL-13     | 0.1478                  | 0.2453  | 0.1446  |
| LIX       | <0.0001                                      | 0.0004  | 0.0085  | LIX       | <0.0001                 | <0.0001 | 0.4014  |
| IL-15     | 0.3835                                       | 0.3268  | 0.2810  | IL-15     | 0.3806                  | 0.8114  | 0.7699  |
| IL-17     | 0.0147                                       | 0.0002  | 0.0186  | IL-17     | 0.9349                  | 0.9350  | 0.6363  |
| IP-10     | 0.0046                                       | 0.0108  | 0.2143  | IP-10     | 0.7379                  | 0.6011  | 0.5694  |
| MCP 1     | 0.0008                                       | 0.0034  | 0.7019  | MCP-1     | <0.0001                 | <0.0001 | 0.0298  |
| MIP1a     | <0.0001                                      | <0.0001 | 0.6122  | MIP1a     | 0.7998                  | 0.9951  | 0.0062  |
| MIP1b     | 0.7768                                       | 0.0073  | 0.2410  | MIP1b     | 0.5375                  | 0.7222  | 0.1662  |
| MCSF      | 0.0489                                       | 0.0423  | 0.7163  | MCSF      | 0.0004                  | 0.0007  | 0.1238  |
| MIP2      | 0.0036                                       | 0.0002  | 0.0676  | MIP2      | 0.0001                  | 0.0011  | 0.6419  |
| MIG       | <0.0001                                      | <0.0001 | 0.2115  | MIG       | 0.0024                  | 0.0080  | <0.0001 |
| RANTES    | 0.4788                                       | 0.0095  | 0.9937  | RANTES    | 0.2723                  | 0.2752  | 0.8484  |
| VEGF      | <0.0001                                      | <0.0001 | 0.0053  | VEGF      | 0.0016                  | 0.0005  | 0.4224  |
| TNF       | 0.0018                                       | 0.0021  | 0.0136  | TNF       | 0.0003                  | 0.0041  | 0.1053  |
| TGF-Beta  | 0.2070                                       | 0.6704  | 0.2283  | TGF-Beta  | 0.8164                  | 0.1466  | 0.0863  |

|                 |                  |                    |            |
|-----------------|------------------|--------------------|------------|
| 0.05 > P > 0.01 | 0.01 > P > 0.001 | 0.001 > P > 0.0001 | P < 0.0001 |
| 0.05 > P > 0.01 | 0.01 > P > 0.001 | 0.001 > P > 0.0001 | P < 0.0001 |

**Supplementary Tables S1 - 5:**

**Supplementary Table S1: Weekly measurement of percent confluence of adherent layer of Serpinb3a<sup>-/-</sup> mouse LTBMCS.**

| group                              | Week 1                        | Week 2                        | Week 3                        | Week 4                        | Week 5                        |
|------------------------------------|-------------------------------|-------------------------------|-------------------------------|-------------------------------|-------------------------------|
| Serpinb3a <sup>-/-</sup>           | 41.9±6.6<br>(n=4)             | 48.8±6.3<br>(n=4)             | 34.4±3.1<br>(n=4)             | 74.4±5.5<br>(n=4)             | 78.8±6.6<br>(n=4)             |
| Serpinb3a <sup>+/+</sup><br>Balb/c | 26.9±2.4<br>(n=4)<br>p=0.0052 | 48.1±2.4<br>(n=4)<br>p=0.8588 | 41.9±2.4<br>(n=4)<br>p=0.0090 | 75.6±1.3<br>(n=4)<br>p=0.6872 | 78.1±2.4<br>(n=4)<br>p=0.8648 |
| group                              | Week 6                        | Week 7                        | Week 8                        | Week 9                        | Week 10                       |
| Serpinb3a <sup>-/-</sup>           | 88.1±4.3<br>(n=4)             | 93.8±1.4<br>(n=4)             | 95.0±0.0<br>(n=4)             | 95.0±0.0<br>(n=4)             | 95.0±0.0<br>(n=4)             |
| Serpinb3a <sup>+/+</sup><br>Balb/c | 86.9±3.8<br>(n=4)<br>p=0.6754 | 94.4±1.2<br>(n=4)<br>p=0.5370 | 95.0±0.0<br>(n=4)<br>p=1.0000 | 95.0±0.0<br>(n=4)<br>p=1.0000 | 95.0±0.0<br>(n=4)<br>p=1.0000 |
| group                              | Week 11                       | Week 12                       | Week 13                       | Week 14                       | Week 15                       |
| Serpinb3a <sup>-/-</sup>           | 95.0±0.0<br>(n=4)             | 95.0±0.0<br>(n=4)             | 95.0±0.0<br>(n=4)             | 95.0±0.0<br>(n=4)             | 95.0±0.0<br>(n=4)             |
| Serpinb3a <sup>+/+</sup><br>Balb/c | 95.0±0.0<br>(n=4)<br>p=1.0000 | 95.0±0.0<br>(n=4)<br>p=1.0000 | 95.0±0.0<br>(n=4)<br>p=1.0000 | 95.0±0.0<br>(n=4)<br>p=1.0000 | 95.0±0.0<br>(n=4)<br>p=1.0000 |
| group                              | Week 16                       | Week 17                       | Week 18                       | Week 19                       | Week 20                       |
| Serpinb3a <sup>-/-</sup>           | 95.0±0.0<br>(n=4)             | 95.0±0.0<br>(n=4)             | 95.0±0.0<br>(n=4)             | 95.0±0.0<br>(n=4)             | 95.0±0.0<br>(n=4)             |
| Serpinb3a <sup>+/+</sup><br>Balb/c | 95.0±0.0<br>(n=4)<br>p=1.0000 | 95.0±0.0<br>(n=4)<br>p=1.0000 | 95.0±0.0<br>(n=4)<br>p=1.0000 | 95.0±0.0<br>(n=4)<br>p=1.0000 | 95.0±0.0<br>(n=4)<br>p=1.0000 |

Analysis of weekly percent confluence of adherent cells, where data are summarized as mean ± standard deviation, n is the number of mice used, and p is the p-value for comparison between Serpinb3a<sup>-/-</sup> and Serpinb3a<sup>+/+</sup> Balb/c background strain groups with the two-sided two sample t-test. Significant p-values are shown in red color.

**Supplementary Table S2: Weekly cobblestone islands in adherent layer of**

**Serpinb3a<sup>-/-</sup> LTBMCS.**

| group                              | Week 1                                 | Week 2                                 | Week 3                           | Week 4                                 | Week 5                                 |
|------------------------------------|----------------------------------------|----------------------------------------|----------------------------------|----------------------------------------|----------------------------------------|
| Serpinb3a <sup>-/-</sup>           | 99.6±41.4<br>(n=4)                     | 354.3±106.4<br>(n=4)                   | 121.9±64.2<br>(n=4)              | 110.5±45.4<br>(n=4)                    | 85.1±26.6<br>(n=4)                     |
| Serpinb3a <sup>+/+</sup><br>Balb/c | 13.0±5.0<br>(n=4)<br><b>p=0.0239</b>   | 140.0±46.3<br>(n=4)<br><b>p=0.0102</b> | 106.5±18.5<br>(n=4)<br>p=0.6617  | 258.5±39.2<br>(n=4)<br><b>p=0.0026</b> | 257.5±89.6<br>(n=4)<br><b>p=0.0102</b> |
| group                              | Week 6                                 | Week 7                                 | Week 8                           | Week 9                                 | Week 10                                |
| Serpinb3a <sup>-/-</sup>           | 97.8±44.6<br>(n=4)                     | 332.9±126.4<br>(n=4)                   | 621.5±293.9<br>(n=4)             | 1107.6±511.3<br>(n=4)                  | 1222.3±425.5<br>(n=4)                  |
| Serpinb3a <sup>+/+</sup><br>Balb/c | 223.0±45.2<br>(n=4)<br><b>p=0.0076</b> | 306.3±55.8<br>(n=4)<br>p=0.7132        | 371.0±126.0<br>(n=4)<br>p=0.1682 | 553.3±145.0<br>(n=4)<br>p=0.0820       | 778.0±197.8<br>(n=4)<br>p=0.1071       |
| group                              | Week 11                                | Week 12                                | Week 13                          | Week 14                                | Week 15                                |
| Serpinb3a <sup>-/-</sup>           | 1454.9±540.9<br>(n=4)                  | 1637.5±735.0<br>(n=4)                  | 1533.6±544.2<br>(n=4)            | 1452.8±428.4<br>(n=4)                  | 1315.9±368.2<br>(n=4)                  |
| Serpinb3a <sup>+/+</sup><br>Balb/c | 891.5±82.7<br>(n=4)<br>p=0.1275        | 1100.0±224.6<br>(n=4)<br>p=0.2114      | 985.0±193.7<br>(n=4)<br>p=0.1062 | 884.5±272.6<br>(n=4)<br>p=0.0665       | 857.5±256.5<br>(n=4)<br>p=0.0871       |
| group                              | Week 16                                | Week 17                                | Week 18                          | Week 19                                | Week 20                                |
| Serpinb3a <sup>-/-</sup>           | 962.0±364.6<br>(n=4)                   | 1082.6±482.0<br>(n=4)                  | 946.3±463.5<br>(n=4)             | 837.9±432.9<br>(n=4)                   | 760.5±308.9<br>(n=4)                   |
| Serpinb3a <sup>+/+</sup><br>Balb/c | 962.0±99.7<br>(n=4)<br>p=1.0000        | 880.5±99.1<br>(n=4)<br>p=0.4673        | 638.0±215.6<br>(n=4)<br>p=0.2732 | 563.5±211.6<br>(n=4)<br>p=0.2981       | 570.0±311.8<br>(n=4)<br>p=0.4187       |

Analysis of the numbers of cobblestone islands, where data are summarized as mean ± standard deviation, n is the number of mice used, and p is the p-value for comparison between Serpinb3a<sup>-/-</sup> and Serpinb3a<sup>+/+</sup> Balb/c background strain groups with the two-sided two sample t-test. Significant p-values are shown in red color.

**Supplementary Table S3: Weekly production of nonadherent cells per flask of**

**Serp**inb**3a<sup>-/-</sup> mouse LTBMCs.**

| group                                       | Week 1                        | Week 2                       | Week 3                       | Week 4                       | Week 5                        |
|---------------------------------------------|-------------------------------|------------------------------|------------------------------|------------------------------|-------------------------------|
| Serp <b>inb</b> 3a <sup>-/-</sup>           | 3.6±0.3<br>(n=4)              | 2.3±0.9<br>(n=4)             | 8.1±3.7<br>(n=4)             | 13.1±3.3<br>(n=4)            | 16.7±3.2<br>(n=4)             |
| Serp <b>inb</b> 3a <sup>+/+</sup><br>Balb/c | 3.3±0.5<br>(n=4)<br>p=0.3401  | 1.1±0.2<br>(n=4)<br>p=0.0669 | 1.0±0.3<br>(n=4)<br>p=0.0295 | 2.9±0.8<br>(n=4)<br>p=0.0069 | 11.5±2.5<br>(n=4)<br>p=0.0466 |
| group                                       | Week 6                        | Week 7                       | Week 8                       | Week 9                       | Week 10                       |
| Serp <b>inb</b> 3a <sup>-/-</sup>           | 15.0±1.8<br>(n=4)             | 13.0±3.9<br>(n=4)            | 10.4±2.7<br>(n=4)            | 12.2±3.7<br>(n=4)            | 10.0±1.0<br>(n=4)             |
| Serp <b>inb</b> 3a <sup>+/+</sup><br>Balb/c | 11.5±1.5<br>(n=4)<br>p=0.0255 | 7.4±2.4<br>(n=4)<br>p=0.0520 | 5.3±2.1<br>(n=4)<br>p=0.0260 | 4.7±1.9<br>(n=4)<br>p=0.0109 | 5.2±1.1<br>(n=4)<br>p=0.0006  |
| group                                       | Week 11                       | Week 12                      | Week 13                      | Week 14                      | Week 15                       |
| Serp <b>inb</b> 3a <sup>-/-</sup>           | 8.7±2.3<br>(n=4)              | 9.2±2.2<br>(n=4)             | 7.1±1.2<br>(n=4)             | 5.2±2.2<br>(n=4)             | 5.3±2.2<br>(n=4)              |
| Serp <b>inb</b> 3a <sup>+/+</sup><br>Balb/c | 5.7±1.2<br>(n=4)<br>p=0.0579  | 7.0±1.1<br>(n=4)<br>p=0.1199 | 4.2±1.7<br>(n=4)<br>p=0.0296 | 3.7±2.3<br>(n=4)<br>p=0.3884 | 3.6±1.7<br>(n=4)<br>p=0.2648  |
| group                                       | Week 16                       | Week 17                      | Week 18                      | Week 19                      | Week 20                       |
| Serp <b>inb</b> 3a <sup>-/-</sup>           | 3.6±1.8<br>(n=4)              | 4.2±1.1<br>(n=4)             | 3.3±1.1<br>(n=4)             | 2.2±0.2<br>(n=4)             | 2.4±0.2<br>(n=4)              |
| Serp <b>inb</b> 3a <sup>+/+</sup><br>Balb/c | 3.2±1.2<br>(n=4)<br>p=0.6837  | 3.4±1.3<br>(n=4)<br>p=0.4293 | 2.0±0.9<br>(n=4)<br>p=0.1120 | 1.7±1.0<br>(n=4)<br>p=0.3894 | 2.0±0.9<br>(n=4)<br>p=0.4531  |

Analysis of weekly non-adherent cell number ( $\times 1000000$ ) data, where data are summarized as mean  $\pm$  standard deviation, n is the number of mice used, and p is the p-value for comparison between Serp**inb**3a<sup>-/-</sup> and Serp**inb**3a<sup>+/+</sup> Balb/c background strain groups with the two-sided two sample t-test. Significant p-values are shown in red color.

**Supplementary Table S4: Weekly production of nonadherent cells per flask that contain day 7 colony forming hematopoietic progenitor cells.**

| group                              | Week 1                        | Week 2                        | Week 3                         | Week 4                         | Week 5                        |
|------------------------------------|-------------------------------|-------------------------------|--------------------------------|--------------------------------|-------------------------------|
| Serpinb3a <sup>-/-</sup>           | 13.0±2.6<br>(n=3)             | 111.3±13.6<br>(n=3)           | 84.7±7.4<br>(n=3)              | 16.0±3.5<br>(n=3)              | 14.3±1.5<br>(n=3)             |
| Serpinb3a <sup>+/+</sup><br>Balb/c | 13.7±3.8<br>(n=3)<br>p=0.8149 | 24.3±6.4<br>(n=3)<br>p=0.0006 | 126.7±1.5<br>(n=3)<br>p=0.0006 | 87.0±10.4<br>(n=3)<br>p=0.0004 | 33.7±3.8<br>(n=3)<br>p=0.0012 |
| group                              | Week 6                        | Week 7                        | Week 8                         | Week 9                         | Week 10                       |
| Serpinb3a <sup>-/-</sup>           | 8.7±3.8<br>(n=3)              | 6.7±0.6<br>(n=3)              | 8.0±2.6<br>(n=3)               | 12.0±2.0<br>(n=3)              | 11.7±2.5<br>(n=3)             |
| Serpinb3a <sup>+/+</sup><br>Balb/c | 12.7±0.6<br>(n=3)<br>p=0.2065 | 9.7±2.3<br>(n=3)<br>p=0.0944  | 7.0±1.7<br>(n=3)<br>p=0.6130   | 7.7±2.9<br>(n=3)<br>p=0.0994   | 7.7±2.1<br>(n=3)<br>p=0.1012  |
| group                              | Week 11                       | Week 12                       | Week 13                        | Week 14                        | Week 15                       |
| Serpinb3a <sup>-/-</sup>           | 8.3±3.2<br>(n=3)              | 6.3±0.6<br>(n=3)              | 9.3±1.5<br>(n=3)               | 9.7±2.3<br>(n=3)               | 5.7±2.9<br>(n=3)              |
| Serpinb3a <sup>+/+</sup><br>Balb/c | 7.3±1.2<br>(n=3)<br>p=0.6388  | 3.0±1.7<br>(n=3)<br>p=0.0341  | 6.3±3.2<br>(n=3)<br>p=0.2181   | 5.3±1.5<br>(n=3)<br>p=0.0535   | 6.0±1.7<br>(n=3)<br>p=0.8722  |
| group                              | Week 16                       | Week 17                       | Week 18                        | Week 19                        | Week 20                       |
| Serpinb3a <sup>-/-</sup>           | 5.3±1.2<br>(n=3)              | 5.0±2.0<br>(n=3)              | 1.7±1.2<br>(n=3)               | 5.3±0.6<br>(n=3)               | 17.7±2.9<br>(n=3)             |
| Serpinb3a <sup>+/+</sup><br>Balb/c | 3.7±1.2<br>(n=3)<br>p=0.1518  | 3.7±1.2<br>(n=3)<br>p=0.3739  | 3.0±1.0<br>(n=3)<br>p=0.2051   | 3.7±1.2<br>(n=3)<br>p=0.0890   | 5.7±1.5<br>(n=3)<br>p=0.0031  |

Analysis of day 7 colony counts at each week, where data are summarized as mean ± standard deviation, n is the sample size, and p is the p-value for comparison between Serpinb3a<sup>-/-</sup> and Serpinb3a<sup>+/+</sup> Balb/c background strain groups with the two-sided two sample t-test. Significant p-values are shown in red color.

**Supplementary Table S5: Weekly production of nonadherent cells per flask that contain day 14 colony forming hematopoietic progenitor cells.**

| group                              | Week 1                        | Week 2                               | Week 3                                | Week 4                                | Week 5                               |
|------------------------------------|-------------------------------|--------------------------------------|---------------------------------------|---------------------------------------|--------------------------------------|
| Serpinb3a <sup>-/-</sup>           | 23.0±4.4<br>(n=3)             | 130.7±8.0<br>(n=3)                   | 93.0±15.7<br>(n=3)                    | 19.3±2.1<br>(n=3)                     | 17.0±2.0<br>(n=3)                    |
| Serpinb3a <sup>+/+</sup><br>Balb/c | 17.7±0.6<br>(n=3)<br>p=0.1661 | 29.0±3.0<br>(n=3) <b>p&lt;0.0001</b> | 139.0±3.6<br>(n=3)<br><b>p=0.0078</b> | 96.0±11.3<br>(n=3)<br><b>p=0.0003</b> | 39.0±7.8<br>(n=3)<br><b>p=0.0091</b> |
| group                              | Week 6                        | Week 7                               | Week 8                                | Week 9                                | Week 10                              |
| Serpinb3a <sup>-/-</sup>           | 12.7±3.8<br>(n=3)             | 7.7±1.2<br>(n=3)                     | 9.0±2.0<br>(n=3)                      | 13.7±1.5<br>(n=3)                     | 12.3±6.7<br>(n=3)                    |
| Serpinb3a <sup>+/+</sup><br>Balb/c | 16.7±3.8<br>(n=3)<br>p=0.2653 | 11.0±3.6<br>(n=3)<br>p=0.2020        | 8.0±1.0<br>(n=3)<br>p=0.4818          | 9.3±1.5<br>(n=3)<br><b>p=0.0255</b>   | 9.7±2.1<br>(n=3)<br>p=0.5441         |
| group                              | Week 11                       | Week 12                              | Week 13                               | Week 14                               | Week 15                              |
| Serpinb3a <sup>-/-</sup>           | 10.0±4.0<br>(n=3)             | 5.3±1.2<br>(n=3)                     | 9.7±1.2<br>(n=3)                      | 11.0±3.6<br>(n=3)                     | 6.7±2.5<br>(n=3)                     |
| Serpinb3a <sup>+/+</sup><br>Balb/c | 8.7±1.5<br>(n=3)<br>p=0.6183  | 4.0±1.7<br>(n=3)<br>p=0.3295         | 6.3±4.0<br>(n=3)<br>p=0.2415          | 6.0±1.0<br>(n=3)<br>p=0.0816          | 8.7±2.5<br>(n=3)<br>p=0.3855         |
| group                              | Week 16                       | Week 17                              | Week 18                               | Week 19                               | Week 20                              |
| Serpinb3a <sup>-/-</sup>           | 6.7±0.6<br>(n=3)              | 6.7±2.3<br>(n=3)                     | 2.0±1.7<br>(n=3)                      | 7.3±1.5<br>(n=3)                      | 21.7±4.7<br>(n=3)                    |
| Serpinb3a <sup>+/+</sup><br>Balb/c | 5.0±1.0<br>(n=3)<br>p=0.0668  | 3.3±0.6<br>(n=3)<br>p=0.0723         | 4.0±1.0<br>(n=3)<br>p=0.1583          | 4.3±0.6<br>(n=3)<br><b>p=0.0335</b>   | 7.0±0.0<br>(n=3)<br><b>p=0.0329</b>  |

Analysis of day 14 colony counts at each week, where data are summarized as mean ± standard deviation, n is the sample size, and p is the p-value for comparison between Serpinb3a<sup>-/-</sup> and Serpinb3a<sup>+/+</sup> Balb/c background strain groups with the two-sided two sample t-test. Significant p-values are shown in red color.
